# Supplementary material for: Expression of miR-1-3p, miR-16-5p and miR-122-5p as Possible Risk Factors of Secondary Cardiovascular Events
Source: MDPI journal article supplement (doi:10.3390/biomedicines9081055), 2021-08-20
Supplement: s1 [file s1]

**Supplementary Table S1.** miR primer sequence details.

| miR name        | microRNA target sequence | Sequence Reference | Corresponding LNA <sup>TM</sup><br>microRNA PCR primer set<br>(cat. No) |
|-----------------|--------------------------|--------------------|-------------------------------------------------------------------------|
| hsa-miR-1-3p    | UGGAAUGUAAAGAAGUAUGUAU   | MIMAT0000416       | EQ-204344                                                               |
| hsa-miR-122-5p  | UGGAGUGUGACAAUGGUGUUUG   | MIMAT0000421       | EQ-205664                                                               |
| hsa-miR-124-3p  | UAAGGCACGCGGUGAAUGCC     | MIMAT0000422       | EQ-204319                                                               |
| hsa-miR-133a-3p | UUUGGUCCCCUUAACCAGCUG    | MIMAT0000427       | EQ-204788                                                               |
| hsa-miR-133b    | UUUGGUCCCCUUAACCAGCUA    | MIMAT0000770       | EQ-204162                                                               |
| hsa-miR-134-5p  | UGUGACUGGUUGACCAGAGGGG   | MIMAT0000447       | EQ-205896                                                               |
| hsa-miR-208b-3p | AUAAGACGAACAAAAGGUUUGU   | MIMAT0004960       | EQ-204636                                                               |
| hsa-miR-34a-5p  | UGGCAGUGUCUUAGCUGGUUGU   | MIMAT0000255       | EQ-204486                                                               |
| hsa-miR-375     | UUUGUUCGUUCGGCUCGCGUGA   | MIMAT0000728       | EQ-204362                                                               |
| hsa-miR-499a-5p | UUAAGACUUGCAGUGAUGUUU    | MIMAT0002870       | EQ-205935                                                               |
